# Supplementary material for: Enhancing energy storage density in lead-free BiFeO3-based relaxor ferroelectric ceramics through multiple optimization designs
Source: Royal Society of Chemistry journal article supplement (doi:10.1039/d4tc04001e), 2024-11-22
Supplement: d4tc04001e1.pdf [file d4tc04001e1.pdf]

## Supporting Information:

# Enhancing energy storage density in Lead-Free BiFeO<sub>3</sub>-Based relaxor ferroelectric ceramics through multiple optimization designs

Hengtong Zhao<sup>a,b</sup>, Pei Han<sup>a,b\*</sup>, Tiantian Zhang<sup>a,b</sup>, Hao Li<sup>a,b</sup>, Jianhua Wu<sup>a,b</sup>, Liwen Zhang<sup>a,b</sup>, Jinhua Du<sup>a,b</sup>, Junyan Zhang<sup>a,b</sup>, Ye Zhao<sup>a,b\*</sup>, Yunying Liu<sup>a,b\*</sup>, Yong Li<sup>a,b\*</sup>

<sup>a</sup> Inner Mongolia Key Laboratory of Advanced Ceramic Materials and Devices, School of Materials Science and Engineering, Inner Mongolia University of Science and Technology, Baotou 014010, China

<sup>b</sup> Key Laboratory of Green Extraction and Efficient Utilization of Light Rare-Earth Resources (Inner Mongolia University of Science and Technology), Ministry of Education, Baotou 014010, China

## Corresponding authors

E-mail addresses: [solidking@163.com](mailto:solidking@163.com) (Pei Han), [yzhao@imust.edu.cn](mailto:yzhao@imust.edu.cn), (Ye Zhao), [liu\\_yunying@126.com](mailto:liu_yunying@126.com) (Yunying Liu), [liyong3062545@126.com](mailto:liyong3062545@126.com) (Yong. Li)

**Keywords:** Energy storage, BiFeO<sub>3</sub>, Relaxor ferroelectric, PNRs

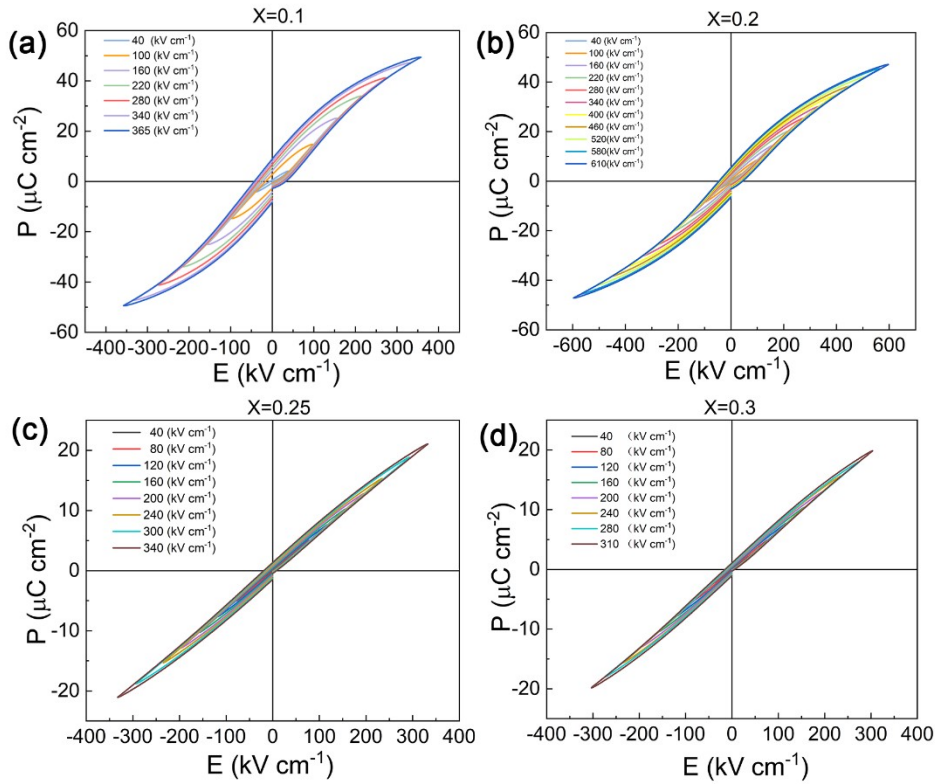

Figure S1. Variation in P-E loops with increasing electric field for BF-BT-CCN ceramics;(a)  $x=0.1$ (b) $x=0.2$  (c) $x=0.25$ (d) $x=0.3$

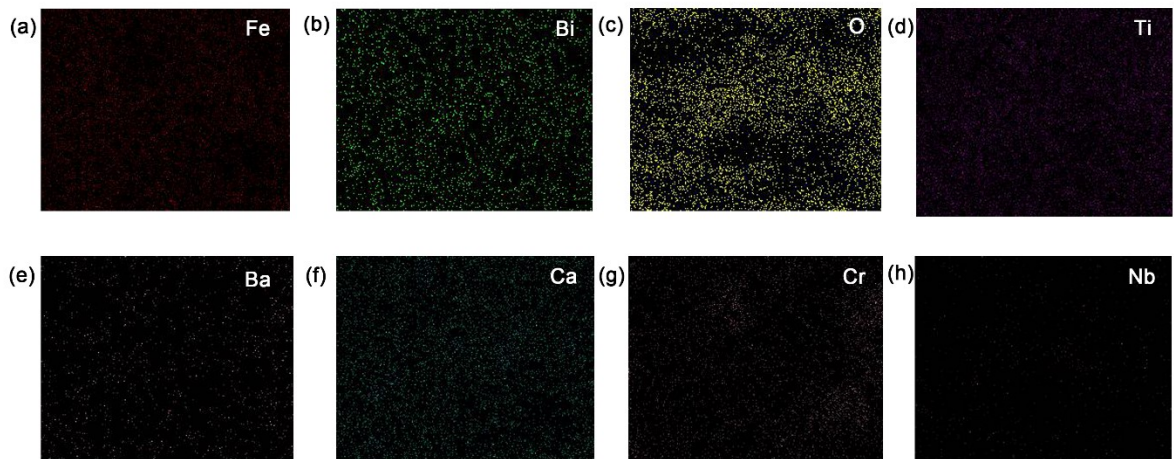

Figure S2. EDS mapping images of BF-BT-0.2CCN.

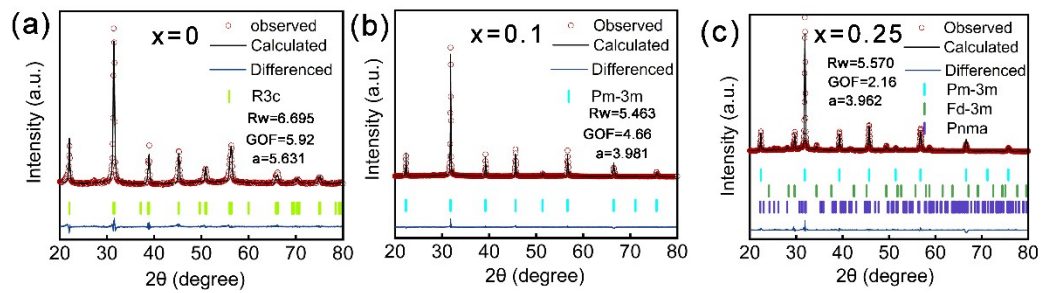

Figure S3. Refinement of XRD.
